# Supplementary material for: Calcium phosphate nanoparticles prepared from infusion fluids for stem cell transfection: process optimization and cytotoxicity analysis
Source: Royal Society of Chemistry journal article supplement (doi:10.1039/c6bm00870d), 2017-01-01
Supplement: c6bm00870d1.pdf [file c6bm00870d1.pdf]

## Calcium Phosphate Nanoparticles Prepared from Infusion Fluids for Stem Cell Transfection: Process Optimization and Cytotoxicity Analysis

Quazi T. H. Shubhra<sup>a\*</sup>, Ayako Oyane<sup>a\*</sup>, Hiroko Araki<sup>a</sup>,

Maki Nakamura<sup>a</sup>, Hideo Tsurushima<sup>a,b</sup>

<sup>a</sup>National Institute of Advanced Industrial Science and Technology (AIST), Central 5-41, 1-1-1 Higashi, Tsukuba, 305-8565, Japan

<sup>b</sup>Department of Neurosurgery, Faculty of Medicine, University of Tsukuba, 1-1-1 Tennoudai, Tsukuba, Ibaraki 305-8575, Japan

### Supplementary Figures

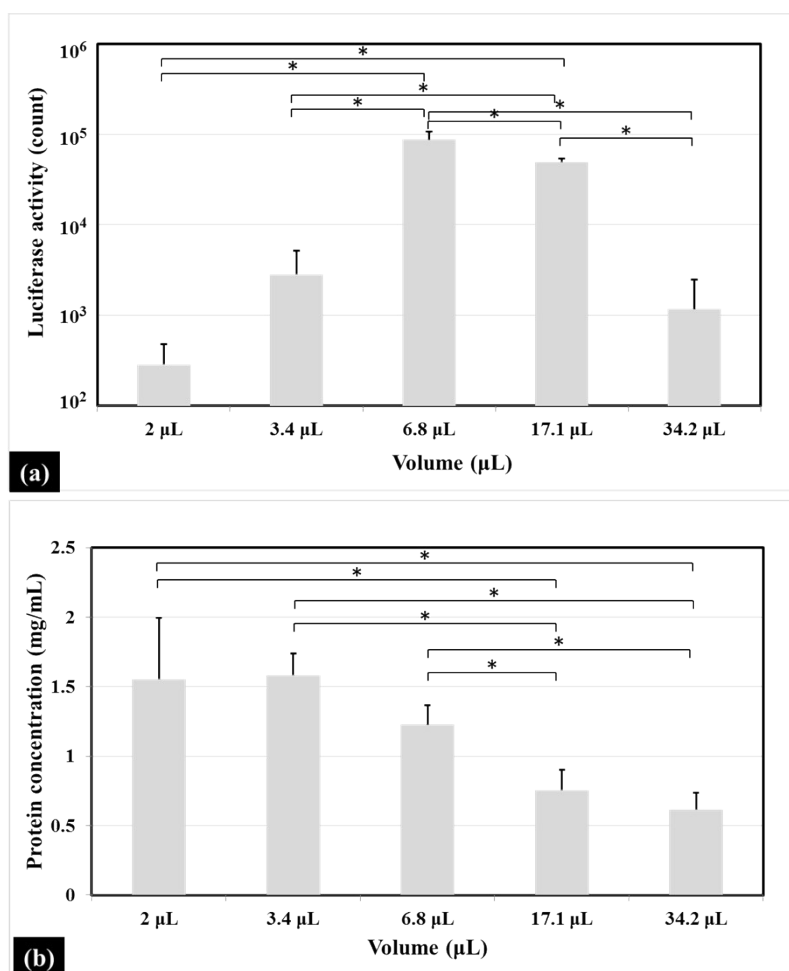

**Fig. S1:** (a) Luciferase activity of CHO-K1 cells after transfection with commercial CaP NPs to optimization the volume, (b) Protein assay for CHO-K1 cells after transfection with the commercial CaP NPs.

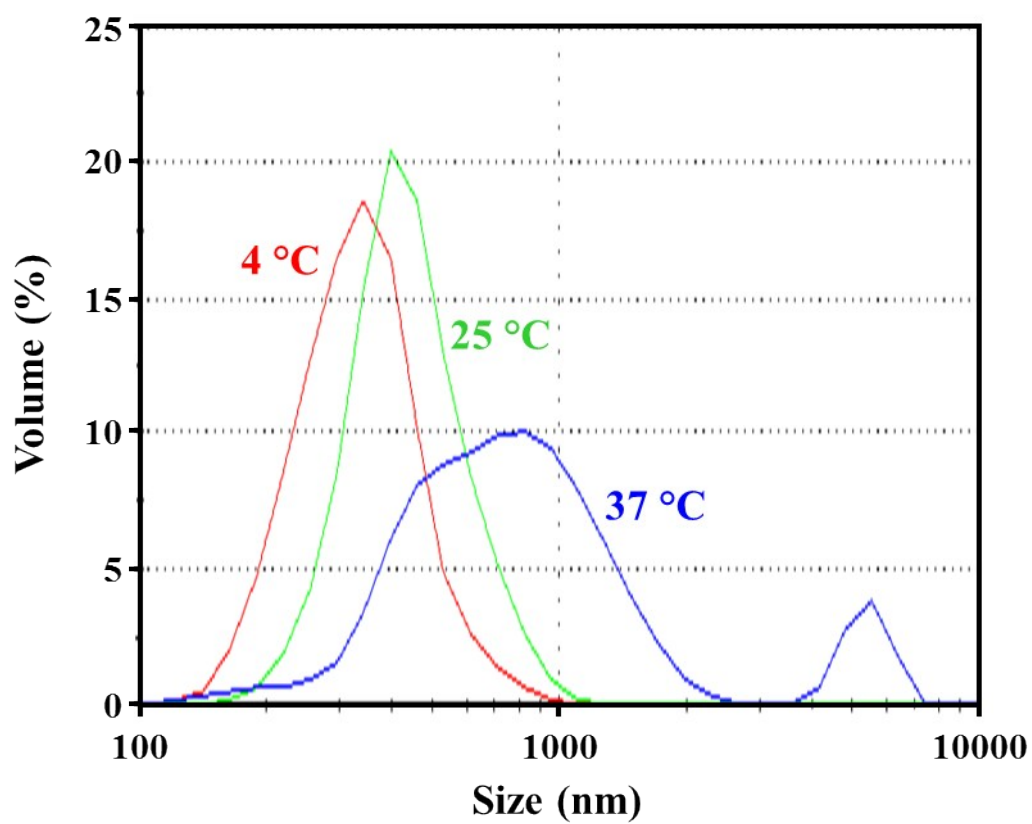

**Fig. S2:** Effect of coprecipitation temperatures on size distributions (by volume) of CaP NPs in the X1.4 solution after 30 min coprecipitation.
